# Supplementary material
Source: publisher figshare collection journal article supplement (https://karger.figshare.com/ndownloader/files/28746471)
Supplement: Supplementary file 1 [file 28746471]

| **Table S1: Classification of reported genetic variants** | |
| --- | --- |
| Disease causing variant | - Affected a known disease gene and - Same variant had previously been described as causing disease, or the variant was similar to known disease-causing variants in that gene and - Overlap in phenotype between our patient and the published patients with mutations in that gene - Variants were classified as P, LP or VUS according to ACMG* |
| Incidental finding | - Variant classified as P or LP according to ACMG* in a disease-causing gene with an associated phenotype which was not (yet) present in the infant or - Variant classified as VUS according to ACMG* in an ‘actionable’ disease-causing gene (with an option of treatment and/or surveillance) which was not (yet) present in the infant and - Associated disease has a childhood onset |

P, pathogenic; LP, likely pathogenic; VUS, Variant of Unknown Significance

*VarSome, an adjusted automated interpretation tool (<https://varsome.com/>)[Kopanos C, et al. VarSome: The human genomic variant search engine. Bioinformatics. 2019;35:1978–1980] was used to classify all variants according to the guidelines of the American College of Medical Genetics (ACMG) [Richards S, et al. Standards and guidelines for the interpretation of sequence variants: a joint consensus recommendation of the American College of Medical Genetics and Genomics and the Association for Molecular Pathology. Genet Med. 2015 May;17(5):405-24] either or in case of chromsomal deletions (*) by manual application of the guidelines.
